# Supplementary material for: PROPERTIES OF ZIRCONIUM DIOXIDE LAYERS PRODUCED BY GAS-FLAME COATING.
Source: PeerJ journal article supplement (doi:10.7717/peerj.18441), 1968-01-01
Supplement: Code_links_and_citations.xlsx [file Code_links_and_citations.xlsx]

## Sheet: Code links and citations for al
Code links and citations for all datasets used
Variable	Format	Spatial resolution	Units	Data sources	Note
LULC(1990, 2000, 2010 and 2020)	tif	30 m	--	https://code.earthengine.google.com/a391359218d63d137710cb4f3dad0131	The author made the code used in the 2020 LULC on the GEE platform
Precipitation(1990, 2000, 2010 and 2020)	tif	30 m	mm	https://doi.org/10.5281/zenodo.3185722.	The author conducted cumulative summation operations on the original data set to obtain the annual precipitation results, and converted the WGS-84 coordinate system in ARCGIS 10.6 software and resampling to a spatial resolution of 30 meters.
Spatial distribution of temperature(1990, 2000, 2010 and 2020)	tif	30 m	℃	https://doi.org/10.11888/Meteoro.tpdc.270961	The author conducted cumulative summation operations on the original data set to obtain the annual mean temperature results, and converted the WGS-84 coordinate system in ARCGIS 10.6 software and resampling to a spatial resolution of 30 meters.
Map of ET (1990, 2000, 2010 and 2020)	tif	30 m	mm	https://doi.org/10.11888/RemoteSen.tpdc.272831	The original dataset covers the globe with a time step of month and a spatial resolution of 1 km in mm/ month.The data set is projected to WGS-84 coordinate system after author clipping, cumulative calculation and resampling.
Map of root restricting layer depth	tif	30 m	mm	HWSD v1.2，http://data.tpdc.ac.cn/zh-hans/data/844010ba-d359-4020-bf76-2b58806f9205/
Map of PAWC	tif	30 m	%
Maximum root depth for plants in this LULC class	xlsx	--	mm	https://naturalcapitalproject.stanford.edu/
Evapotranspiration coefficient of different LULC class	xlsx	--	Dimensionless	https://naturalcapitalproject.stanford.edu/
Digital elevation model(DEM)	tif	30 m	m	NASA/NASADEM_HGT/001，https://code.earthengine.google.com/
Watersheds and Subwatersheds	shp	--	Dimensionless	ARCGIS 10.6
