# Supplementary material for: PROPERTIES OF ZIRCONIUM DIOXIDE LAYERS PRODUCED BY GAS-FLAME COATING.
Source: PeerJ journal article supplement (doi:10.7717/peerj.18441), 1968-01-01
Supplement: Forecast_results.xlsx [file Forecast_results.xlsx]

## Sheet: Forecast results of LULC area u
Forecast results of LULC area under different development scenarios in 2030
LULC	Area (km2)				Change Area (km2)
	NAS	EPS	UDS	ADS	NAS	EPS	UDS	ADS
Cropland	12888.9	12526.2	14678.6	16872.3	-1847.83	-2210.51	-58.12	2135.55
Forest	76369.2	76375.6	74644.1	72504.8	1722.12	1728.53	-3.01	-2142.3
Shrub	81.15	225.73	150.23	143.86	-69.33	75.24	-0.26	-6.62
Grass	352.51	969.93	641.24	627.22	-294.1	323.31	-5.38	-19.4
Water	1317.83	1155.17	1050.68	1104.11	267.68	105.02	0.53	53.96
Barren	0.33	0.01	0.35	0.38	-0.06	-0.39	-0.05	-0.02
Construction	1280.23	1037.51	1124.98	1037.52	221.53	-21.19	66.28	-21.17
