# Supplementary material for: PROPERTIES OF ZIRCONIUM DIOXIDE LAYERS PRODUCED BY GAS-FLAME COATING.
Source: PeerJ journal article supplement (doi:10.7717/peerj.18441), 1968-01-01
Supplement: Water_conservation.xlsx [file Water_conservation.xlsx]

## Sheet: Water conservation across vario
Water conservation across various land types
year/scenario		Cropland	Forest	Shrub	Grass	Water	Barren	Construction
1990	min	205.861	234.424	315.651	264.77	0	598.198	418.204
	max	946.158	976.301	969.187	999.35	182.283	904.666	966.765
	mean	592.37	635.984	576.532	587.467	0.0111472	781.66	670.002
2000	min	250.434	300.047	369.009	292.831	0	783.418	458.563
	max	1300.95	1322.93	1315.76	1346.8	307.964	916.578	1317.89
	mean	691.655	738.638	643.218	660.591	8.41336	806.138	773.449
2010	min	329.119	357.41	468.331	405.647	0	804.869	562.982
	max	1187.96	1222.29	1174.45	1234.29	313.492	917.85	1254.38
	mean	709.594	765.411	707.425	718.849	4.64433	845.527	802.166
2020	min	263.651	310.356	342.518	307.071	0	567.055	490.54
	max	1255.61	1271.01	1248.66	1296.72	442.615	963.4	1212.58
	mean	577.233	634.34	573.58	572.093	0.77293	715.619	670.144
2030NAS	min	121.069	160.172	344.996	208.449	0	480.413	396.552
	max	971.24	984.985	973.47	1008.12	236.266	825.312	980.357
	mean	557.352	613.705	558.027	553.47	0.061354	686.113	622.929
2030EPS	min	125.571	160.172	344.996	208.449	0	480.413	396.552
	max	971.24	984.985	973.47	1008.12	225.661	825.312	992.932
	mean	558.337	613.796	555.836	548.132	0.0616376	676.104	626.192
2030UDS	min	120.747	160.172	344.996	208.449	0	480.413	396.552
	max	971.24	984.985	973.47	1008.12	378.251	825.312	1085.2
	mean	557.725	614.508	555.1	552.572	0.0590534	684.438	621.285
2030ADS	min	125.571	160.172	344.996	208.449	0	480.413	396.552
	max	971.24	984.985	973.47	1008.12	218.754	825.312	980.357
	mean	563.38	614.557	553.038	552.878	0.0607274	690.327	620.827
